# Supplementary material for: Aggregation behavior of the blends of PS-b-PEO-b-PS and PS-b-PMMA at the air/water interface
Source: Royal Society of Chemistry journal article supplement (doi:10.1039/c4ra08579e), 2014-01-01
Supplement: c4ra08579e1.pdf [file c4ra08579e1.pdf]

*Electronic Supporting Information of Manuscript ID*

*RA-ART-08-2014-008579*

**Aggregation behavior of the blends of PS-*b*-PEO-*b*-PS  
and PS-*b*-PMMA at the air/water interface**

**Xiaoqun Wang, Gangyao Wen,\* Changchun Huang, Zhuang Wang and**

**Yunbo Shi**

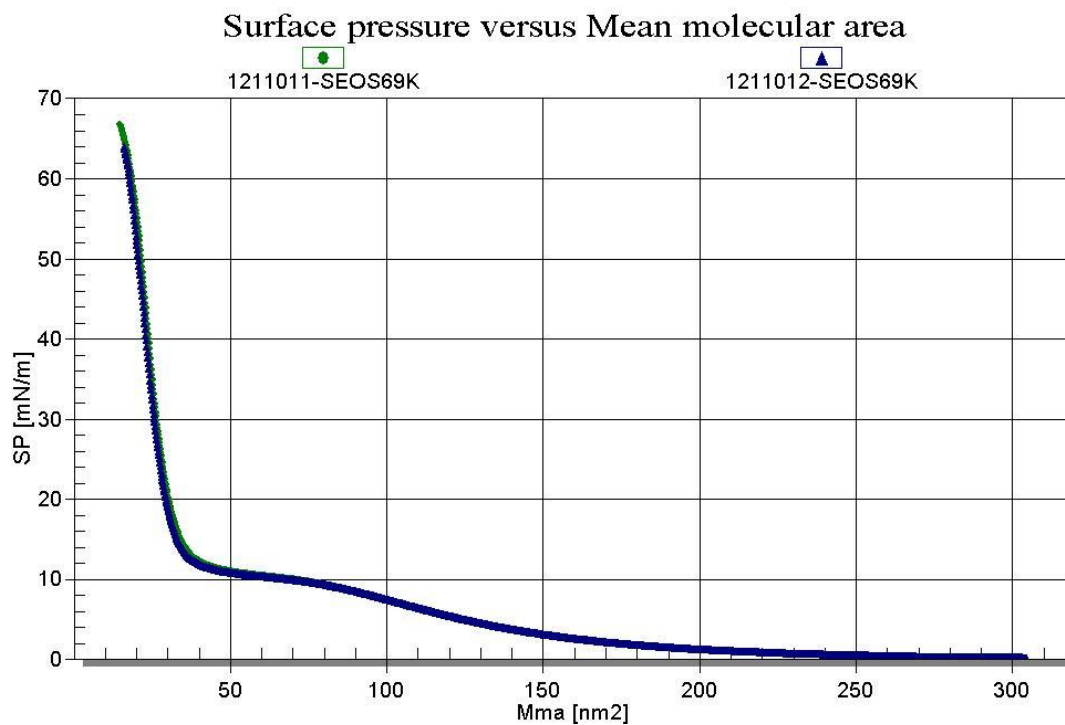

**Fig. S1**  $\pi$ -A isotherms of the Langmuir monolayers of SEOS69K at 25 °C.

\* To whom correspondence should be addressed. E-mail: gywen@hrbust.edu.cn.

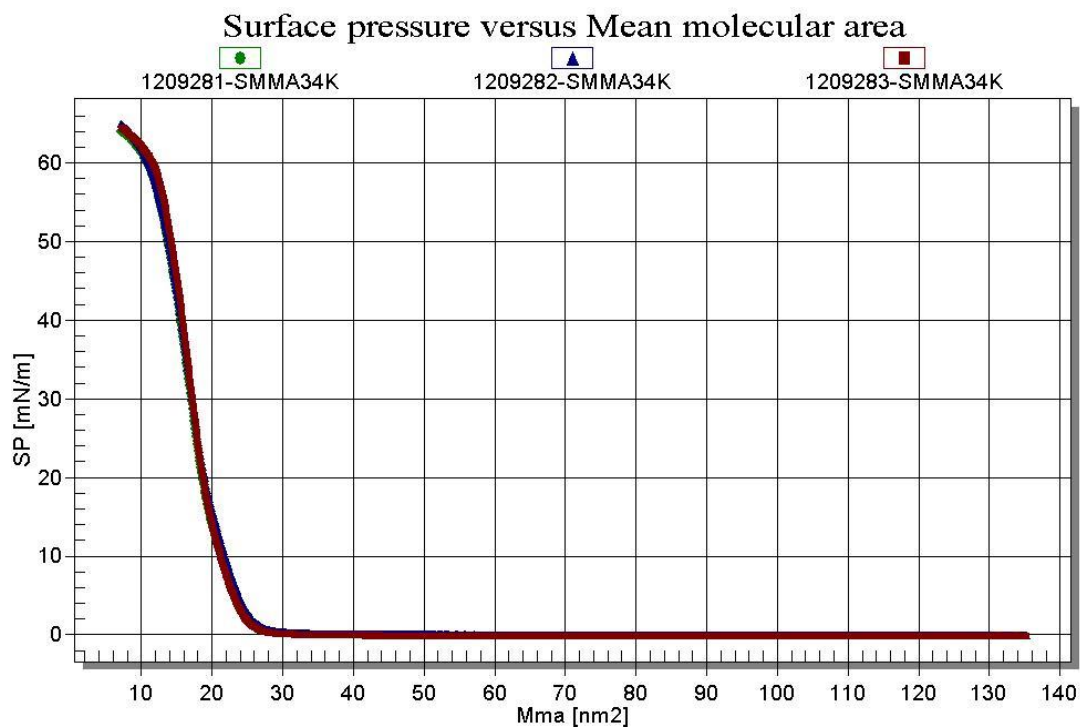

**Fig. S2**  $\pi$ -A isotherms of the Langmuir monolayers of SMMA34K at 25 °C.

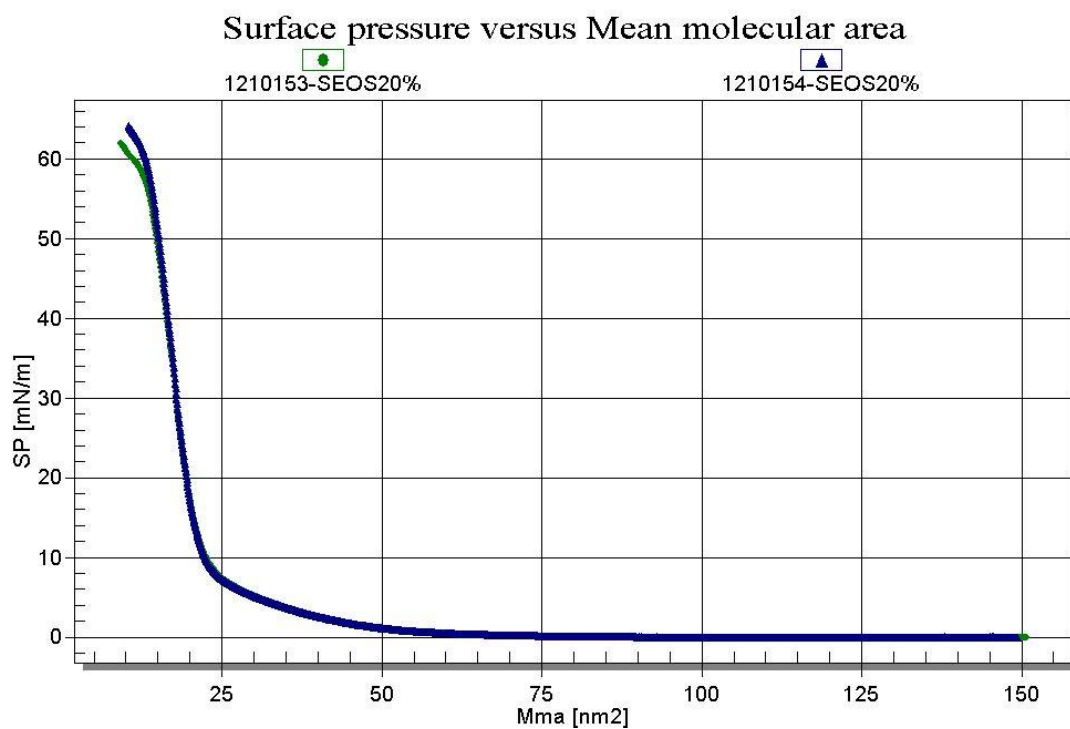

**Fig. S3**  $\pi$ -A isotherms of the Langmuir monolayers of SEOS69K-20% at 25 °C.

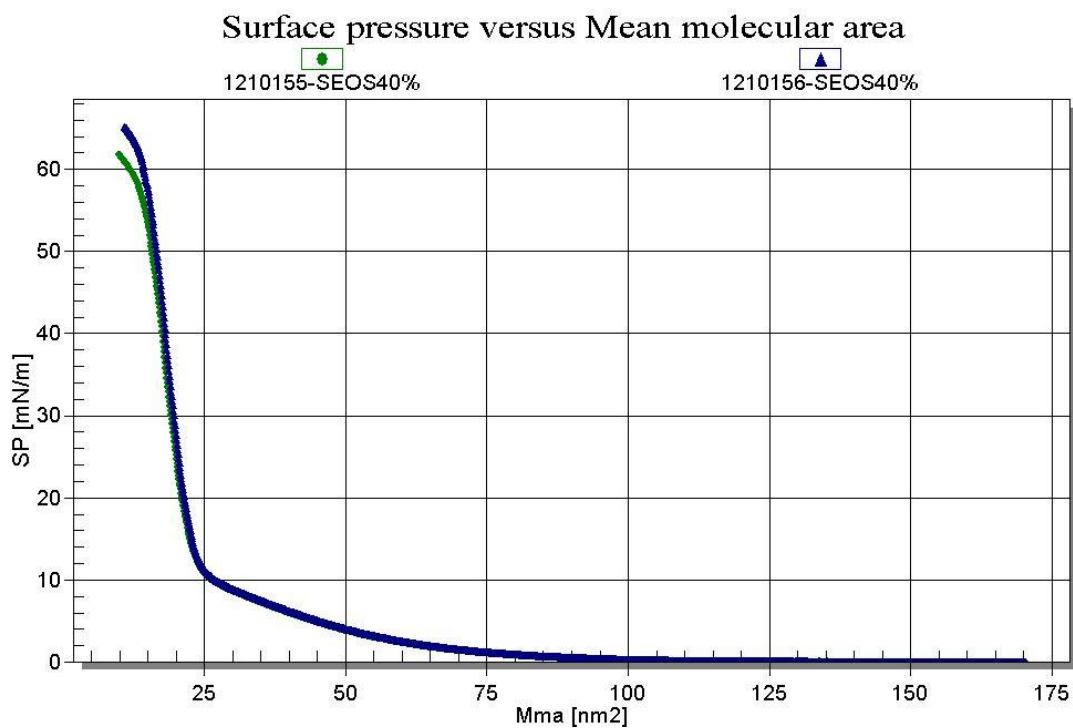

**Fig. S4**  $\pi$ -A isotherms of the Langmuir monolayers of SEOS69K-40% at 25 °C.

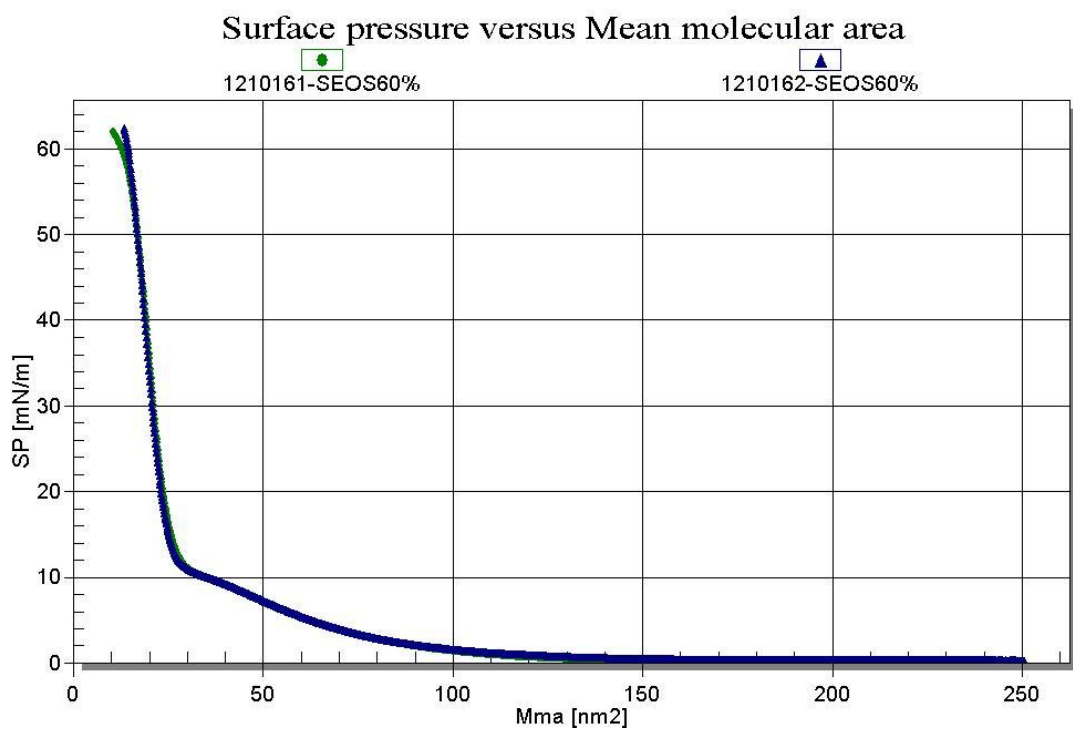

**Fig. S5**  $\pi$ -A isotherms of the Langmuir monolayers of SEOS69K-60% at 25 °C.

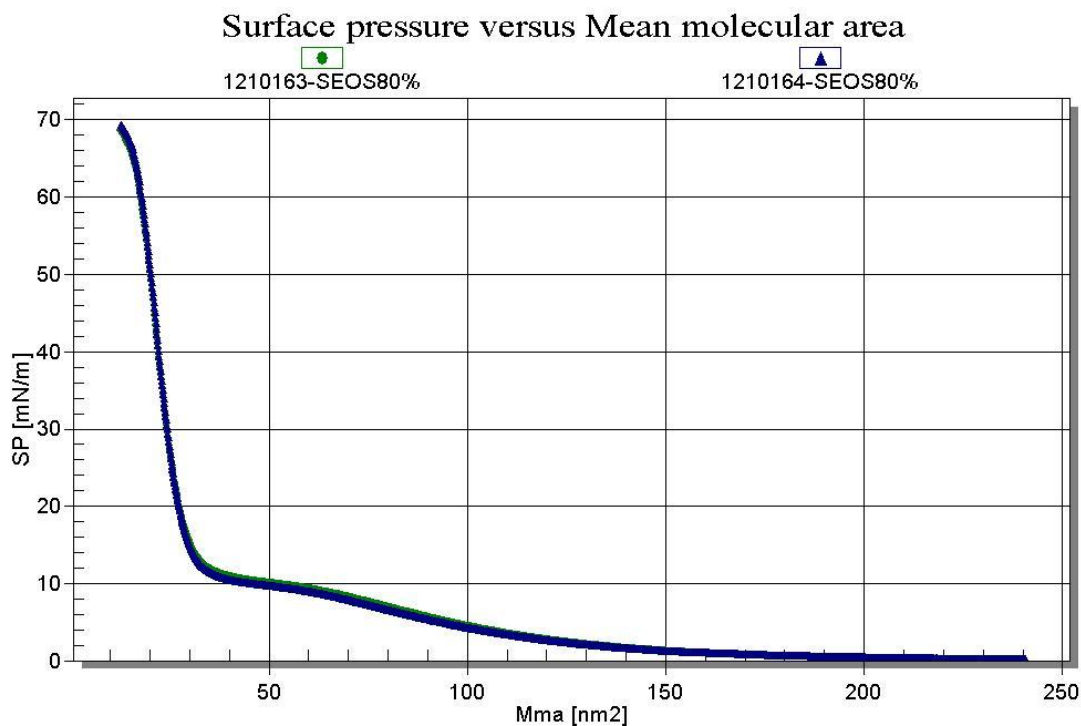

**Fig. S6**  $\pi$ -A isotherms of the Langmuir monolayers of SEOS69K-80% at 25 °C.

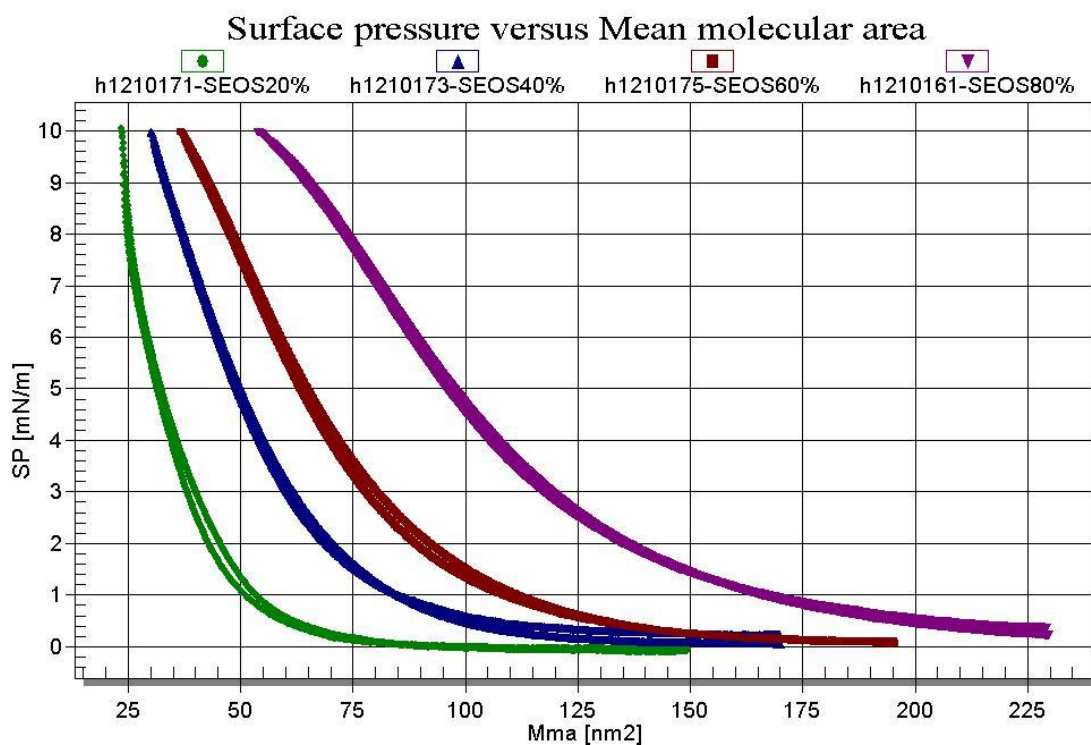

**Fig. S7** Hysteresis curves of the mixed Langmuir monolayers of SEOS69K-20%, SEOS69K-40%, SEOS69K-60% and SEOS69K-80%. The  $\pi_{max}$  is 10 mN/m.

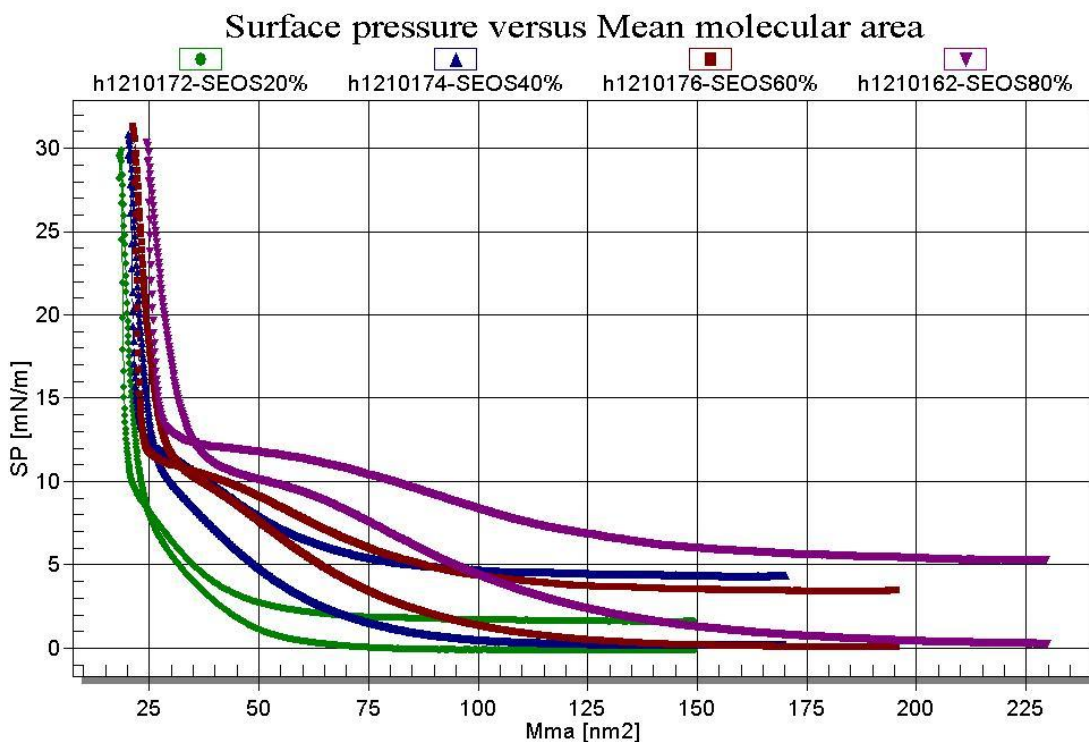

**Fig. S8** Hysteresis curves of the mixed Langmuir monolayers of SEOS69K-20%, SEOS69K-40%, SEOS69K-60% and SEOS69K-80%. The  $\pi_{\max}$  is 30 mN/m.

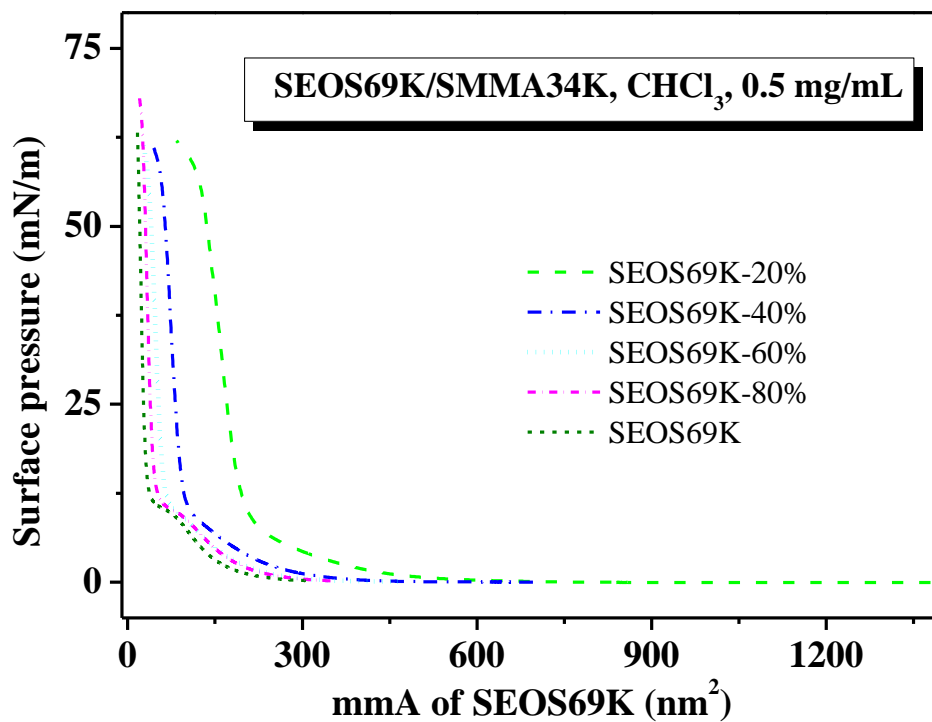

**Fig. S9** Surface pressure of the Langmuir monolayers of SEOS69K and the blends as a function of the mma of SEOS69K at 25 °C.
